# Supplementary material
Source: publisher site journal article supplement (https://www.dovepress.com/article/479654)
Supplement: Supplementary file 1 [file get_supplementary_file.php]

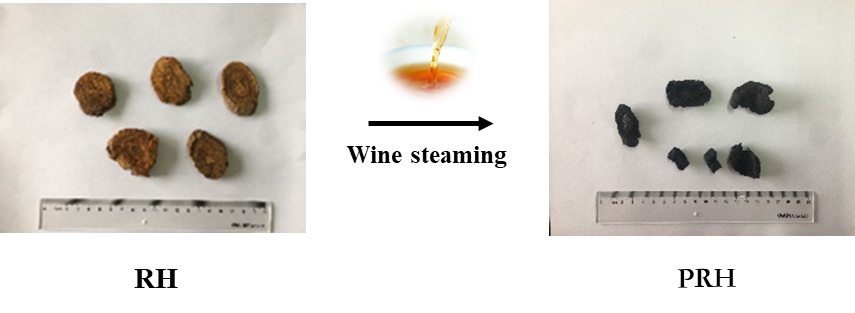


**Fig. S1.** The picture of RH steamed with wine before and after


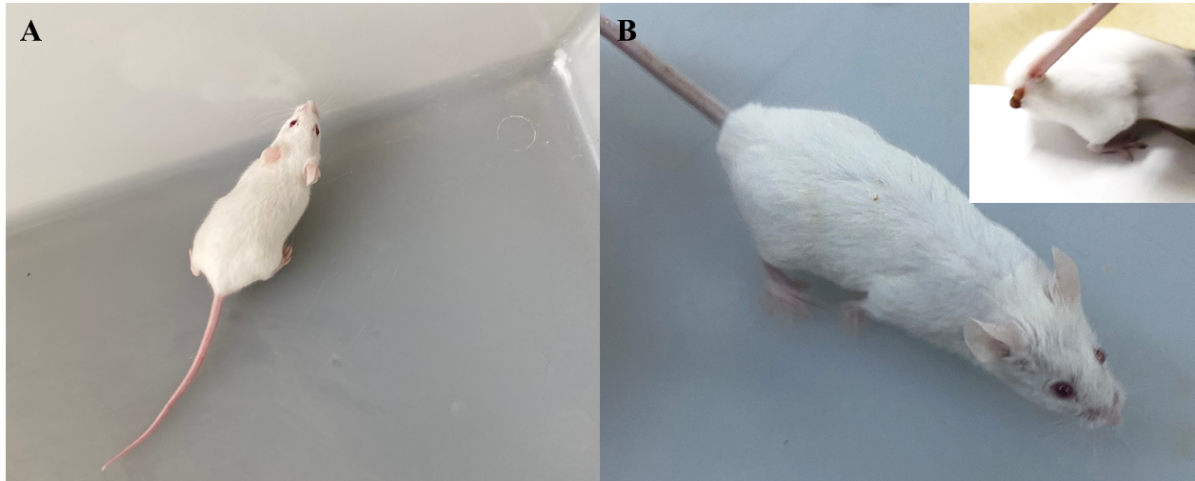


**Fig. S2.** The result of appearance and behavior in each group (A: control group; B: administration group)


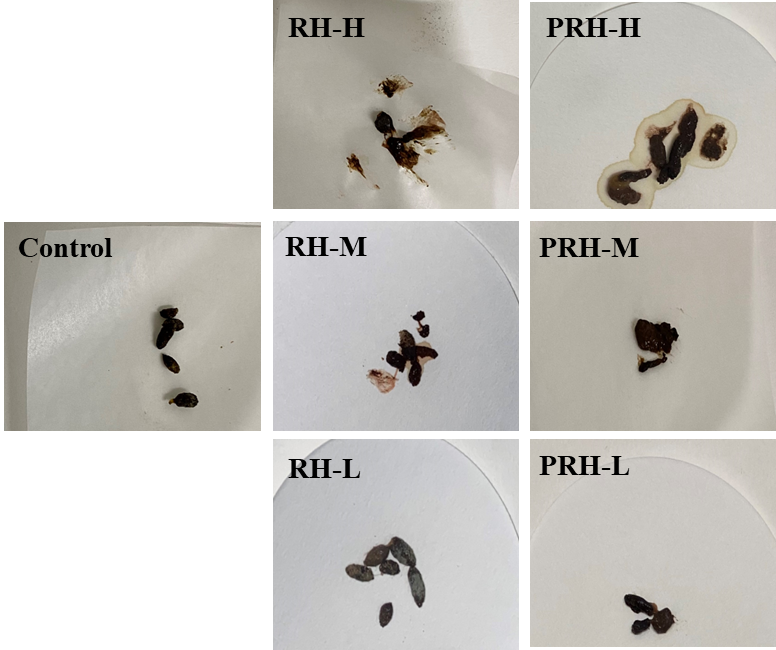


**Fig. S3.** The fecal morphology of each group


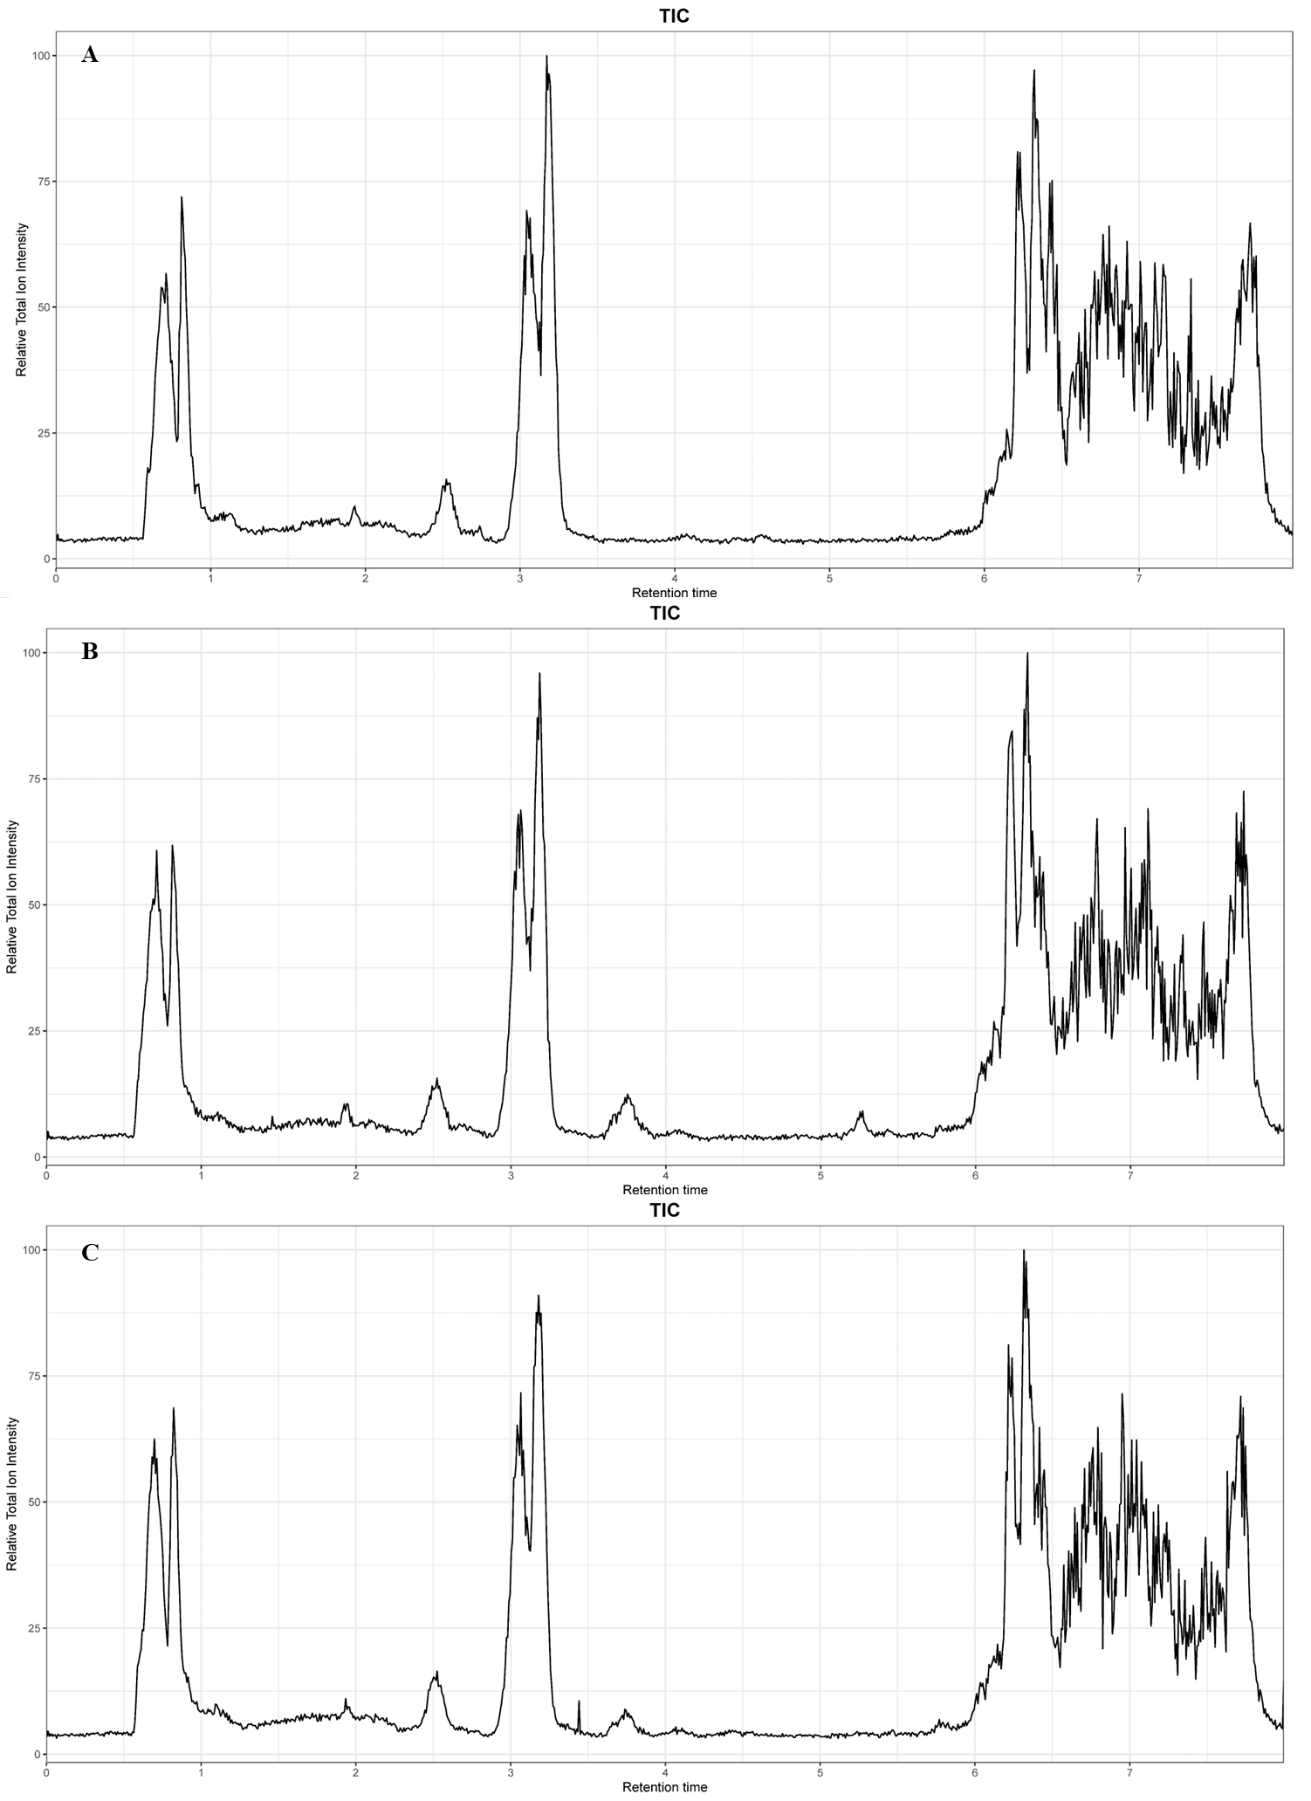


**Fig. S4**. Base peak intensity (BPI) chromatogram of serum samples (ESI+；A, Control; B, RH-H; C, PRH-H)

**
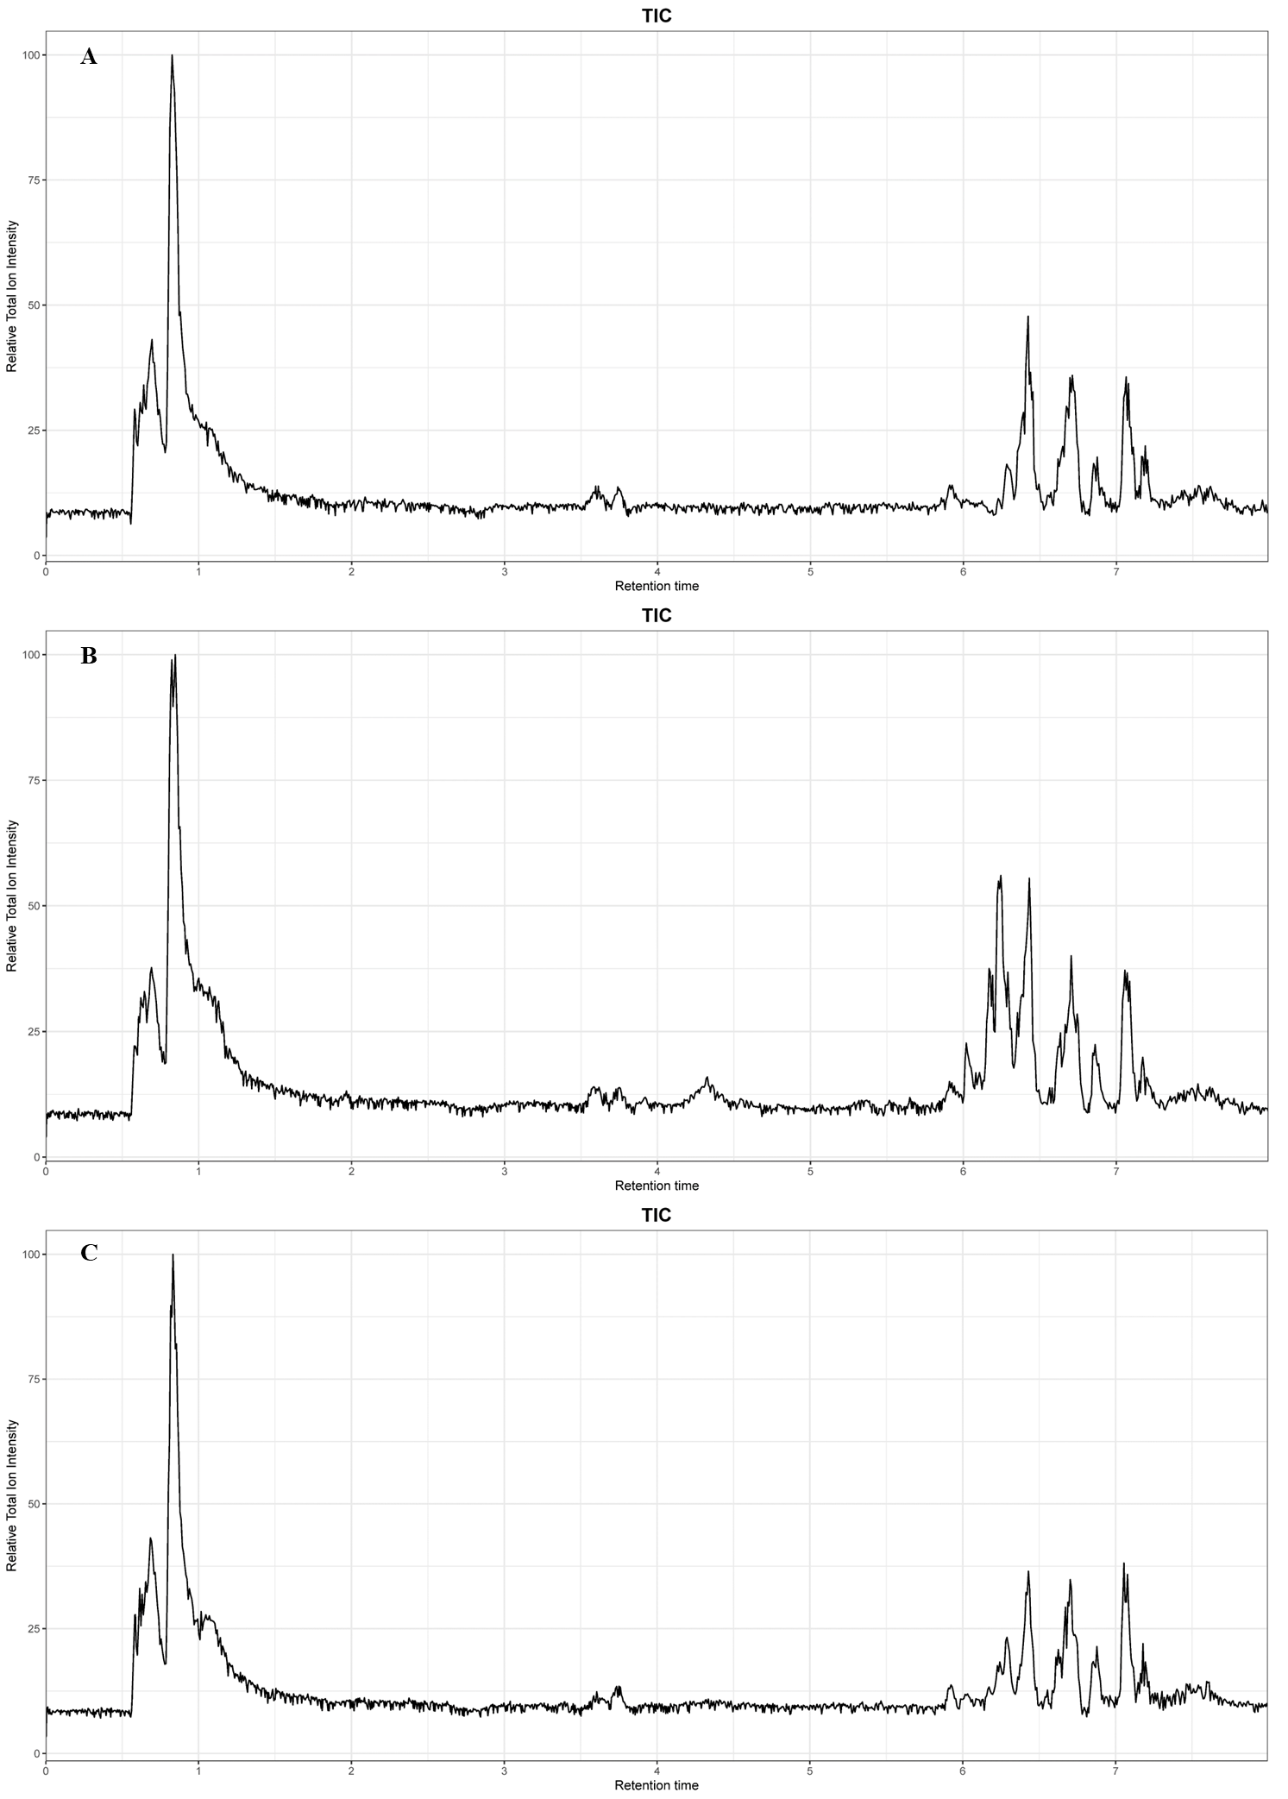
**

**Fig. S5**. Base peak intensity (BPI) chromatogram of serum samples (ESI-；A, Control; B, RH-H; C, PRH-H)

**
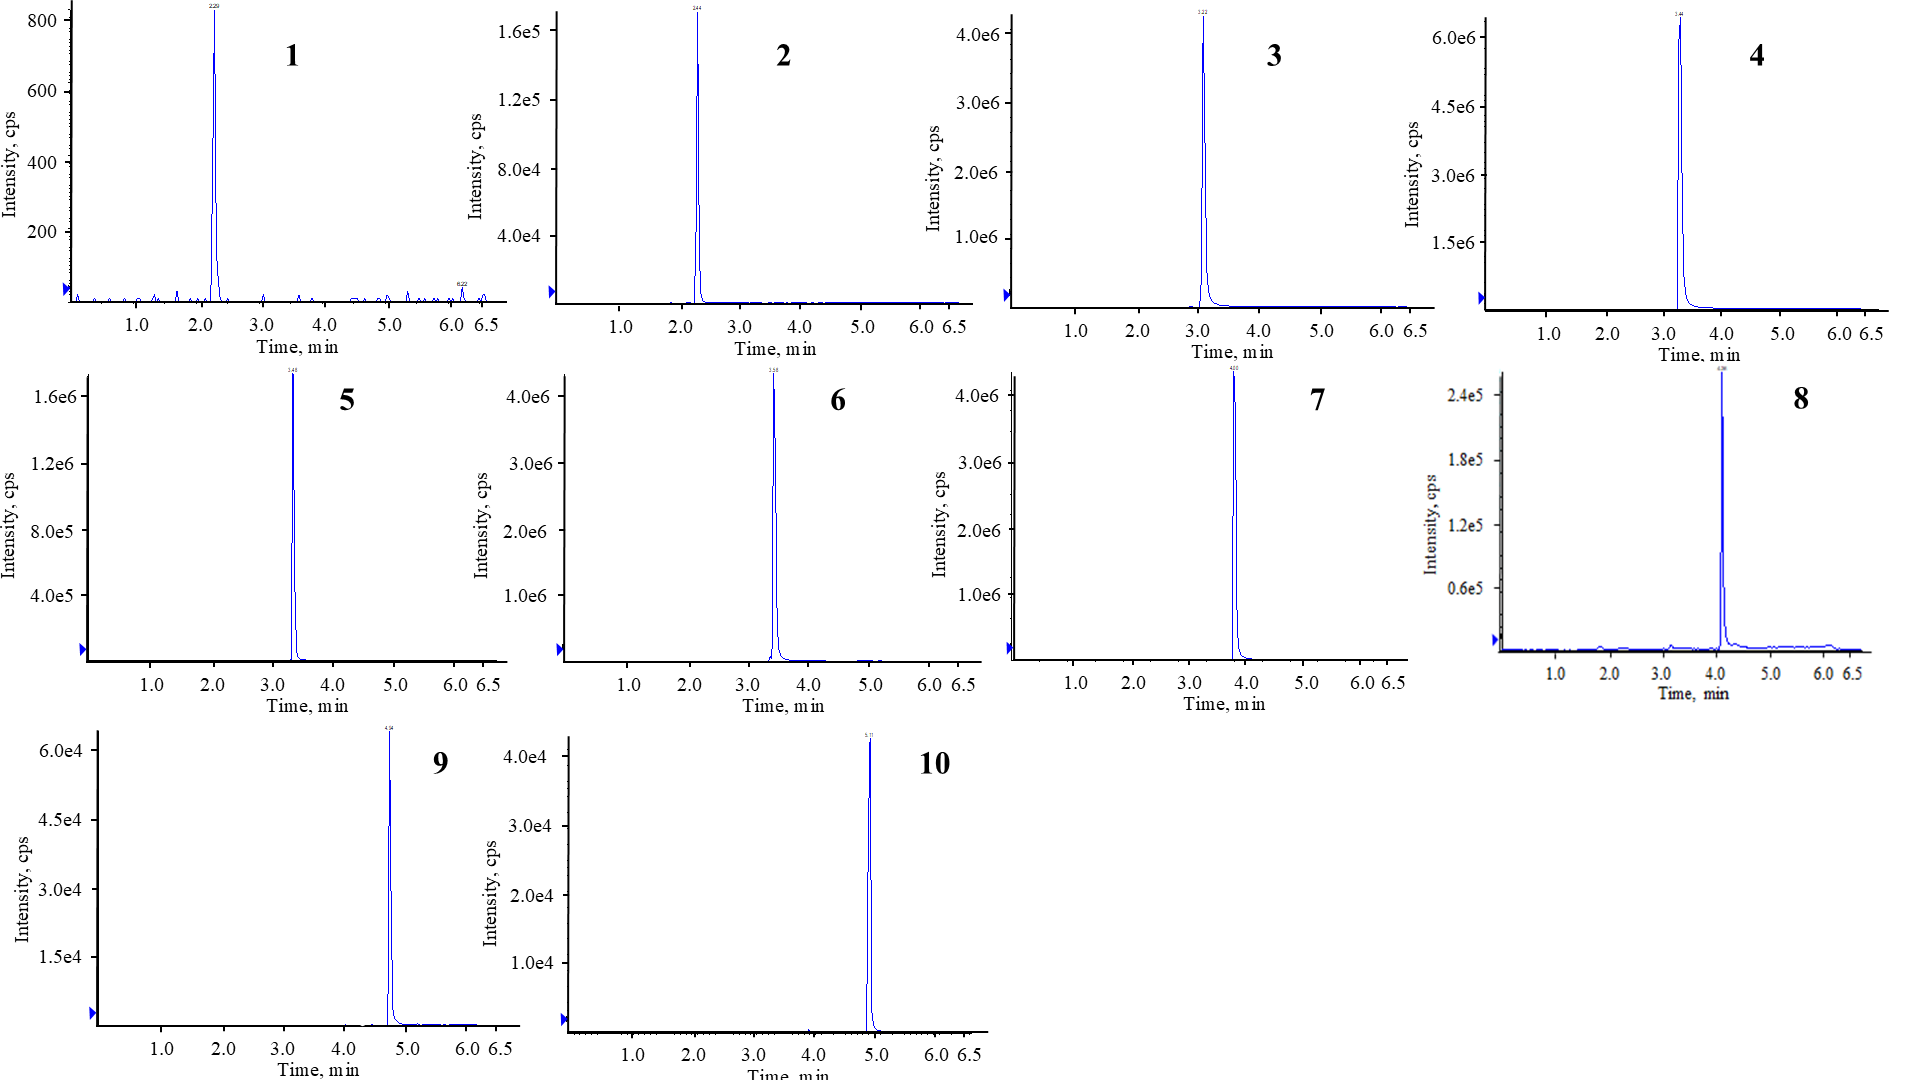
**

**Fig. S6**. The representative MRM chromatograms of standard solutions (Sennoside B, **1**; Rhein-8-*O*-*β*-D-glucopyranoside, **2**; Emodin-8-*O*-*β*-D-glucopyranoside, **3**; Aloe-emodin-3-(hydroxymethyl)-*O*-*β*-D-glucopyranoside, **4**; Chrysophanol-8-*O*-*β*-D-glucoside, **5**; Physcion-8-*O*-*β*-D-glucopyranoside, **6**; Aloe emodin, **7**; Emodin, **8**; Chrysophanic acid, **9**; Physcion, **10**)


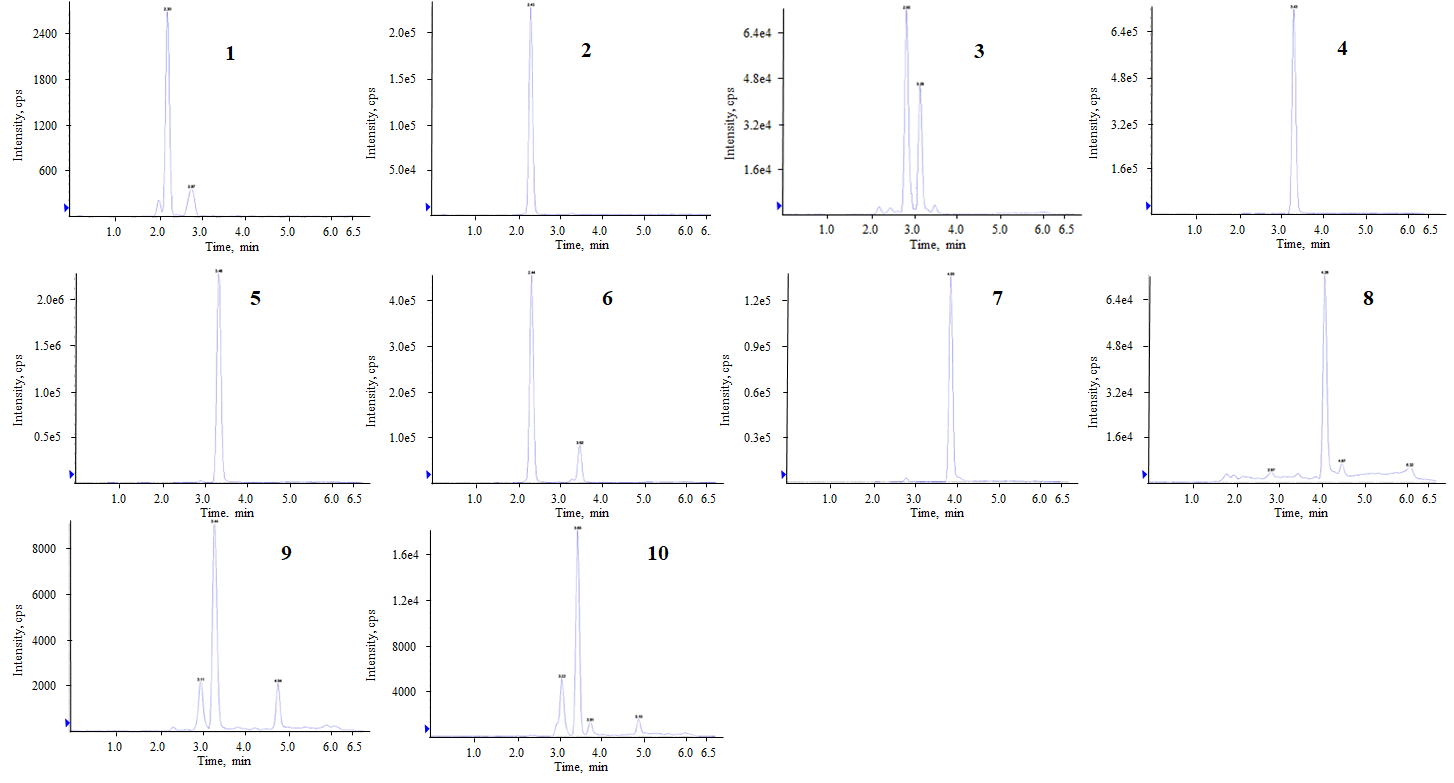


**Fig. S7**. The representative MRM chromatograms of RH (Sennoside B, **1**; Rhein-8-*O*-*β*-D-glucopyranoside, **2**; Emodin-8-*O*-*β*-D-glucopyranoside, **3**; Aloe-emodin-3-(hydroxymethyl)-*O*-*β*-D-glucopyranoside, **4**; Chrysophanol-8-*O*-*β*-D-glucoside, **5**; Physcion-8-*O*-*β*-D-glucopyranoside, **6**; Aloe emodin, **7**; Emodin, **8**; Chrysophanic acid, **9**; Physcion, **10**)


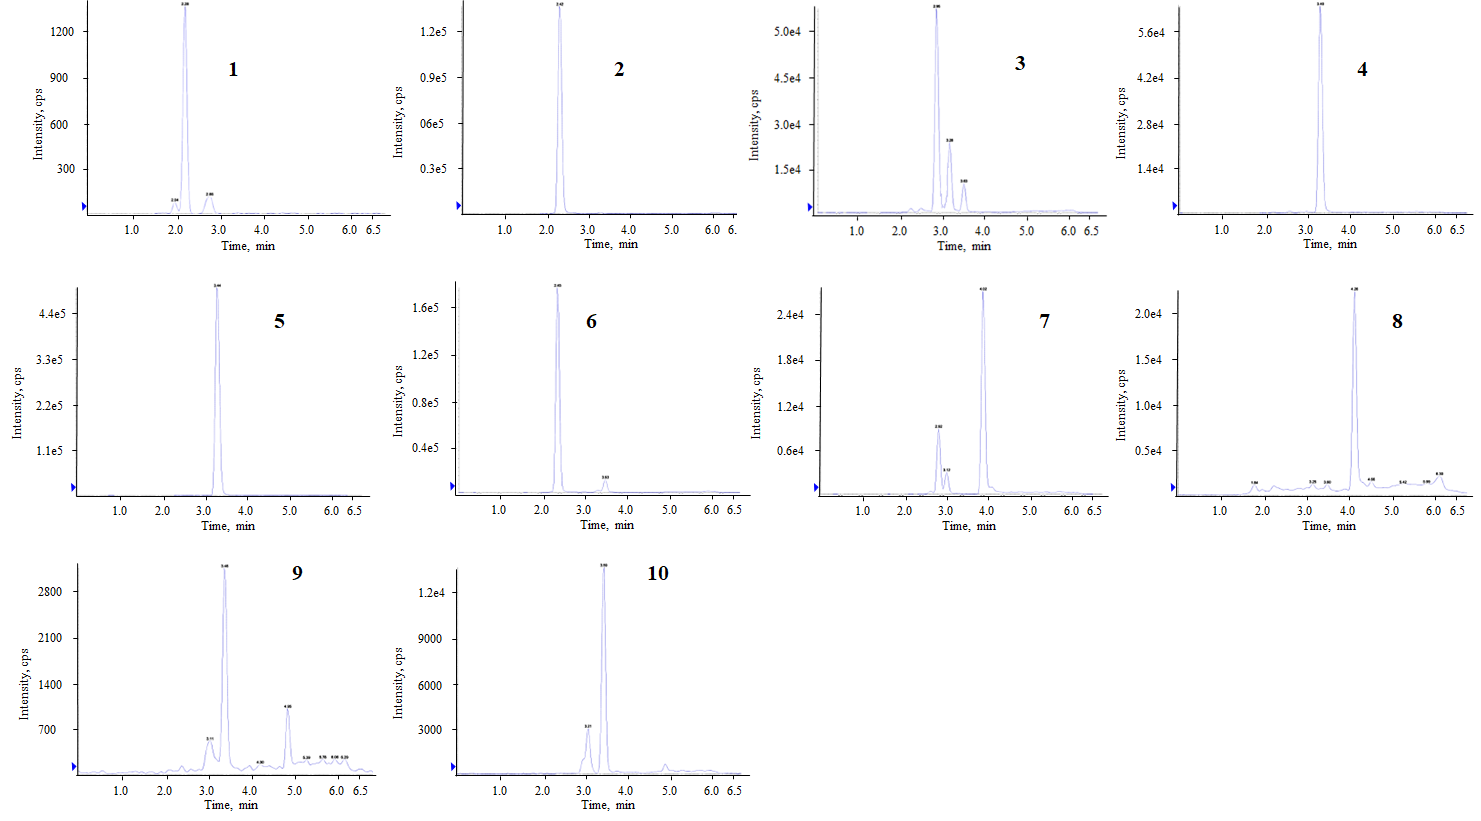


**Fig. S8**. The representative MRM chromatograms of PRH (Sennoside B, **1**; Rhein-8-*O*-*β*-D-glucopyranoside, **2**; Emodin-8-*O*-*β*-D-glucopyranoside, **3**; Aloe-emodin-3-(hydroxymethyl)-*O*-*β*-D-glucopyranoside, **4**; Chrysophanol-8-*O*-*β*-D-glucoside, **5**; Physcion-8-*O*-*β*-D-glucopyranoside, **6**; Aloe emodin, **7**; Emodin, **8**; Chrysophanic acid, **9**; Physcion, **10**)

**Table S1**. Identiﬁcation results of potential serum metabolites (n=6, Control vs PRH-H)

| No | Metabolite | FC | VIP |
| --- | --- | --- | --- |
| 1 | (R)-Lipoic acid | 1.191 | 1.687 |
| 2 | Salicylaldehyde | 0.731 | 2.721 |
| 3 | Aflatoxin G1 | 0.841 | 1.598 |
| 4 | 4-coumaroylshikimate | 0.783 | 2.754 |
| 5 | Cephalosporin C | 1.218 | 1.829 |
| 6 | Luteolin | 0.583 | 3.545 |
| 7 | Coniferaldehyde | 0.770 | 2.480 |
| 8 | Sn-glycero-3-Phosphoethanolamine | 0.676 | 2.898 |
| 9 | PG(13:0/18:0) | 1.265 | 2.104 |
| 10 | Gentisic acid | 0.548 | 3.907 |
| 11 | Pretyrosine | 0.442 | 3.649 |
| 12 | Isopropylmaleic acid | 0.792 | 2.382 |
| 13 | Hydroxyphenylacetylglycine | 0.886 | 1.720 |
| 14 | 7-Methylxanthosine | 0.591 | 3.980 |
| 15 | Apigenin | 0.872 | 1.604 |
| 16 | Salidroside | 0.522 | 4.344 |
| 17 | Ascorbic Acid | 0.588 | 3.054 |
| 18 | Genistein | 0.466 | 3.271 |

**Table S1**. Continued

| No | Metabolite | FC | VIP |
| --- | --- | --- | --- |
| 19 | Kaempferol | 0.757 | 2.107 |
| 20 | P-Coumaric Acid | 0.832 | 2.211 |
| 21 | Tetrahydrofolyl-[Glu](2) | 0.617 | 3.480 |
| 22 | 4-Isopropylbenzoic Acid | 0.803 | 2.039 |
| 23 | Allantoic acid | 0.704 | 2.326 |
| 24 | Isoquercitroside | 0.706 | 2.604 |
| 25 | Pimelic Acid | 0.747 | 1.883 |
| 26 | Trans-Resveratrol | 0.782 | 1.643 |
| 27 | Adenylosuccinic acid | 0.709 | 2.598 |
| 28 | Secologanin | 0.697 | 2.606 |
| 29 | 2,3-Dihydroxycarbamazepine | 0.753 | 2.270 |
| 30 | 3-deoxy-D-manno-octulosonate 8-phosphate | 0.726 | 2.414 |
| 31 | Citalopram propionic acid | 0.798 | 2.110 |
| 32 | Deoxyloganin | 0.776 | 2.296 |
| 33 | D-Sedoheptulose 7-phosphate | 0.719 | 2.719 |

**Table S2**. Pathway analysis of potential biomarkers

| No. | Pathway | Total | Hits | Raw p | Impact |
| --- | --- | --- | --- | --- | --- |
| 1 | Glycerophospholipid metabolism | 36 | 2 | 0.018003 | 0.06185 |
| 2 | Pentose phosphate pathway | 22 | 1 | 0.12436 | 0.02775 |
| 3 | Alanine, aspartate and glutamate metabolism | 28 | 1 | 0.1558 | 0.02163 |

**Table S3**. MS parameters of targeted analytes

| Compounds | Molecular Weight (MW) | Ion Transitions (m/z) |
| --- | --- | --- |
| 1 | 863.74 | 861.400/386.200 |
| 2 | 488.46 | 445.100/239.100 |
| 3 | 432.38 | 431.200/269.000 |
| 4 | 432.38 | 431.200/268.200 |
| 5 | 416.38 | 415.200/253.100 |
| 6 | 446.41 | 445.200/283.100 |
| 7 | 270.23 | 269.100 240.100 |
| 8 | 270.23 | 269.100/225.100 |
| 9 | 254.24 | 253.200/225.100 |
| 10 | 284.27 | 283.200/240.200 |

**Table S4** The linear regression equations, linearity range and correlation coefficients for anthraquinone/anthrone

| Compounds | Regression equation | Correlation coefficient (r) | Linear range (ng/mL) | LOQ (ng/mL) |
| --- | --- | --- | --- | --- |
| **1** | Y=19.779X+533.72 | R²=0.9992 | 24.328-4533.817 | 23.501 |
| **2** | Y=4659X+10253 | R²=0.9997 | 25.399-5028.764 | 46.287 |
| **3** | Y=4017.2X+56254 | R²=0.9992 | 0.986-1103.880 | 11.952 |
| **4** | Y=14783X+127264 | R²=0.9993 | 0.987-1056.057 | 10.528 |
| **5** | Y=14918X+180361 | R²=0.9991 | 0.993-1043.685 | 32.592 |
| **6** | Y=12689X-23266 | R²=0.9996 | 0.991-1239.356 | 10.261 |
| **7** | Y=4026.1X+48060 | R²=0.9994 | 0.999-1078.589 | 15.594 |
| **8** | Y=3173.5X+27731 | R²=0.9995 | 0.992-1098.585 | 13.026 |
| **9** | Y=962.04X+4473.6 | R²=0.9995 | 1.036-1233.150 | 12.214 |
| **10** | Y=404.24X+1737.1 | R²=0.9992 | 1.002-1201.755 | 11.655 |

**Table S5** The results of the precision, repeatability, stability and Recovery (n=6)

| Compounds | Precision  RSD (%) | Repeatability  RSD (%) | Stability  RSD (%) | Recovery  RSD (%) |
| --- | --- | --- | --- | --- |
| **1** | 1.87 | 2.25 | 2.21 | 1.68 |
| **2** | 2.25 | 2.74 | 2.82 | 2.94 |
| **3** | 1.81 | 0.93 | 1.39 | 2.06 |
| **4** | 2.49 | 2.21 | 2.37 | 1.85 |
| **5** | 2.51 | 2.89 | 2.63 | 2.46 |
| **6** | 1.91 | 2.92 | 2.89 | 2.85 |
| **7** | 2.39 | 2.59 | 2.81 | 2.65 |
| **8** | 1.43 | 2.87 | 1.58 | 1.46 |
| **9** | 1.25 | 2.8 | 2.25 | 2.07 |
| **10** | 2.41 | 1.85 | 2.76 | 1.98 |
